# Supplementary material
Source: PubMed Central journal article supplement (PMC4136259)
Supplement: JVI.01269-14_zjv999099343so1.pdf [file JVI.01269-14_zjv999099343so1.pdf]

### Supplementary Figure 1. MX/Mx wild type and chimerae amino acid sequences.

The sequences of huMX1, huMX2, mmMx1, mmMx2 and Flag tag are shown in red, blue, purple, green and black, respectively. Mutated residues are highlighted in grey.

#### MX1-Flag

MVVSEVDIAKADPAAASHPLLLNGDATVAQKNPGSVAENNLCSQYEEKVRPCIDLIDSLRALGVEODLA  
LPAAVIGDQSSGKSSVLEALSGVALPRGSGIVTRCPLVLKLLKLVNEDKWRGKVSQDYIEIISDASE  
VEKEINKAQNAIAGEGMGISHELITLEISSRDVDPDLTLIDLPGITRVAVGNQPADIGYKIKTLIKKYIQ  
RQETISLVVVPNSVDIATTEALSMAQEVDPEDGRTIGILTKPDLVDKGTEDKVVDVVRNLVFLKKGYM  
IVKCRGQQEIQDQLSLSEALQREKIFFENHPYFRDLLEEGKATVPCLAEKLTSELI THICKSLPLENQ  
IKETHQRITTEELQKYGVDIPEDENEKMFFLIDKINAFNQDITALMQGEETVGEEDIRLFTRLRHEFHKW  
STIENNFOEGHKILSRKIQKFENQYRGRELPGFVNRYRTFETIVKQQIKALEEPAVDMLHTVTDMLVRLA  
FTDVSIGNFEFFNLHRTAKSKIEDIRAEQEREKEKLI RLFHFQMEQIVYCDQVYRGALQKVREKELEE  
EKKKSWDFGAFQSSSATDSSMEEIFQHLMAYHQEASKRIS SHIPLIQFFMLQTYGQQLOKAMLQLLQ  
DKDQTYSWLLKERSDTS DKRKFLKERLARLTQARRRLAQFPGdykdddk\*

#### MX2-Flag

MSKAHKPWPYRRRSQFSSRKYLKEMNSFQQQPPFGTVPPQMMFPPNWQGAEKDAAFLAKDFNFLTIN  
NQPPPGNRSQPRAMGPENNLYSQYEQVRCIDLIDSLRALGVEQDLALPAIAVIGDQSSGKSSVLEAL  
SGVALPRGSGIVTRCPLVLKLLKQPCAWAGRISYRNTELELQDPGQVEKEIHKANVMAGNNGRIGISHE  
LISLEITSPEVPDLTIIDLPGITRVAVDNQPRDIGLQIKALIKKYIQRQQTINLVVVPNSVDIATTEAL  
SMAHEVDPEGDRTIGILTKPDLMDRGTEKSVMNVRNLTYPLKKGMIIVKCRGQQEITNRLSLAEATKK  
EITFFQTHPYFRVLLEEGSATVPRLAERLTTELIMHIQKSLPLEGQIRESHQKATEELRRCGADIPSQ  
EADKMFFLIEKIKMFNQDIEKLVEGEEVRENETRLYNKIREDFKNVWGILATNTQKVKNIIHEEVEKY  
EKQYRGKELLGFVNYKTFEIVHQYIQQLVEPALSMLOKAMEIQQAFINVAKKHFGEFFNLNQTVQST  
IEDIKVKHTAKAENMIQLQFRMEQMVFCQDQIYSVVLKVVREEIFNPLGTPSQNMKLN SHFPPSNSSVS  
SFTEIGIHLNAYFLET SKRLANQIPFIIQYFMLRENGDSLQKAMMQILQEKRNRYSWLLQEQSETATKRR  
ILKERIYRLTQARHALCQFSSKEIHdykdddk\*

#### MX2<sub>26-715</sub>-Flag

MSKAHKPWPYRRRSQFSSRKYLKEMNSFQQQPPFGTVPPQMMFPPNWQGAEKDAAFLAKDFNFLTIN  
NQPPPGNRSQPRAMGPENNLYSQYEQVRCIDLIDSLRALGVEQDLALPAIAVIGDQSSGKSSVLEAL  
SGVALPRGSGIVTRCPLVLKLLKQPCAWAGRISYRNTELELQDPGQVEKEIHKANVMAGNNGRIGISHE  
LISLEITSPEVPDLTIIDLPGITRVAVDNQPRDIGLQIKALIKKYIQRQQTINLVVVPNSVDIATTEAL  
SMAHEVDPEGDRTIGILTKPDLMDRGTEKSVMNVRNLTYPLKKGMIIVKCRGQQEITNRLSLAEATKK  
EITFFQTHPYFRVLLEEGSATVPRLAERLTTELIMHIQKSLPLEGQIRESHQKATEELRRCGADIPSQ  
EADKMFFLIEKIKMFNQDIEKLVEGEEVRENETRLYNKIREDFKNVWGILATNTQKVKNIIHEEVEKY  
EKQYRGKELLGFVNYKTFEIVHQYIQQLVEPALSMLOKAMEIQQAFINVAKKHFGEFFNLNQTVQST  
IEDIKVKHTAKAENMIQLQFRMEQMVFCQDQIYSVVLKVVREEIFNPLGTPSQNMKLN SHFPPSNSSVS  
SFTEIGIHLNAYFLET SKRLANQIPFIIQYFMLRENGDSLQKAMMQILQEKRNRYSWLLQEQSETATKRR  
ILKERIYRLTQARHALCQFSSKEIHdykdddk\*

#### MX1(L<sub>4MX2</sub>)-Flag

MVVSEVDIAKADPAAASHPLLLNGDATVAQKNPGSVAENNLCSQYEEKVRPCIDLIDSLRALGVEODLA  
LPAAVIGDQSSGKSSVLEALSGVALPRGSGIVTRCPLVLKLLKLVNEDKWRGKVSQDYIEIISDASE  
VEKEINKAQNAIAGEGMGISHELITLEISSRDVDPDLTLIDLPGITRVAVGNQPADIGYKIKTLIKKYIQ  
RQETISLVVVPNSVDIATTEALSMAQEVDPEDGRTIGILTKPDLVDKGTEDKVVDVVRNLVFLKKGYM  
IVKCRGQQEIQDQLSLSEALQREKIFFENHPYFRDLLEEGKATVPCLAEKLTSELI THICKSLPLENQ  
IKETHQRITTEELQKYGVDIPEDENEKMFFLIDKINAFNQDITALMQGEETVGEEDIRLFTRLRHEFHKW  
STIENNFOEGHKILSRKIQKFENQYRGRELPGFVNRYRTFETIVKQQIKALEEPAVDMLHTVTDMLVRLA  
FTDVSIGNFEFFNLHRTAKSKIEDIRAEQEREKEKLI RLFHFQMEQIVYCDQIYSVVLKVVREEIFNP  
LGTSPSQNMKLN SHFPPSNSSVS MEEIFQHLMAYHQEASKRIS SHIPLIQFFMLQTYGQQLOKAMLQL  
LQDKDQTYSWLLKERSDTS DKRKFLKERLARLTQARRRLAQFPGdykdddk\*

**MX2(L<sub>MX1</sub>)-Flag**

MSKAHKPWPYRRRSQFSSRKYLKEMNSFQQQPPPF<sup>G</sup>TVPPQMMFPPNWQGAEKDAAFLAKDFNFLTIN  
NQPPPGNRSQPRAMGPENNLYSQYEQKVRPCIDLIDSLRALGVEQDLALPAIAVIGDQSSGKSSVLEAL  
SGVALPRGSGIVTRCPLVLKLLKQPC<sup>E</sup>AWAGRISYRNTELELQDPGQVEKEIHK<sup>A</sup>QNV<sup>M</sup>MAGN<sup>G</sup>RGISHE  
LISLEITSPEVPDLTIIDLPGITRVAVDN<sup>Q</sup>PRDIGLQIKALIKKYIQRQQTINLVVPCNVDIATTEAL  
SMAHEVDPEGDRITIGILTKPDLMDRGTEK<sup>S</sup>VMNVVRNLTYPLKKG<sup>Y</sup>MI<sup>V</sup>KCRGQ<sup>Q</sup>EITNRLSLAEATKK  
EITFFQTHPYFRVLL<sup>E</sup>EGSATVPRLAERLTTELIMHIQKSLP<sup>L</sup>LEGQIRE<sup>S</sup>HQKATEELRRCGADIP<sup>S</sup>Q  
EADKMFFLIEKIKMFNQDIEKLVEGEEVREN<sup>E</sup>TRLYNKIREDFKNVW<sup>G</sup>ILATNTQKV<sup>K</sup>NIIEHEVEKY  
EKQYRGKELLGFVNYKTFEIVH<sup>Q</sup>YIQQLVEPAL<sup>S</sup>MLQKAMEIIQQA<sup>F</sup>IN<sup>V</sup>AKKH<sup>F</sup>G<sup>E</sup>FFNLNQT<sup>V</sup>OST  
IEDIKVKHTAKAENMIQLQFRMEQ<sup>M</sup>VF<sup>C</sup>QDQVYRGALQKVREKELEEEK<sup>K</sup>KK<sup>S</sup>WDFGAFQSSSATD<sup>S</sup>SS<sup>F</sup>  
TEIGIHLNAYFLET<sup>S</sup>KRLANQIPFIQYFMLRENGDSLQKAMMQILQEK<sup>N</sup>RYSWLLQEQ<sup>S</sup>ETATKRRIL  
KERIYRLTQARHALCQFSSEIHdykddd<sup>k</sup>\*

**MX1(Stalk<sub>MX2</sub>)-Flag**

MVVSEVDIAKADPAAASHPLLLNGDATVAQKNPGSVAENNLCSQYEEKVRPCIDLIDSLRALGVEQDLA  
LP<sup>A</sup>IAVIGDQSSGKSSVLEALSGVALPRGSGIVTRCPLVLKLLKLVNEDKWRGK<sup>V</sup>S<sup>Y</sup>QDY<sup>E</sup>IEISDASE  
VEKEINKAQNAIAGEGMGISHELITL<sup>E</sup>ISSRDV<sup>P</sup>DLTLIDLPGITRVA<sup>V</sup>GNQPADIGYKIK<sup>T</sup>L<sup>I</sup>KKYIQ  
RQETISLVVPSNVDIATTEALSMAQ<sup>E</sup>VDPEGDRITIGILTKPDLV<sup>D</sup>KGTE<sup>D</sup>KVVDVVRNLV<sup>F</sup>H<sup>L</sup>KKG<sup>Y</sup>M  
IVKCRGQ<sup>Q</sup>EIQDQLSLSEALQREKIFFENHPYFRD<sup>L</sup>LEEGKATVPC<sup>L</sup>AEKLTSELITHICKSLP<sup>L</sup>LENQ  
IKETHQRITEELQKYGV<sup>D</sup>IP<sup>E</sup>Q<sup>E</sup>ADKMFFLIEKIKMFNQDIEKLVEGEEVREN<sup>E</sup>TRLYNKIREDFKNW  
VGILATNTQKV<sup>K</sup>NIIEHEVEKEYEKQYRGKELLGFVNYKTFEIVH<sup>Q</sup>YIQQLVEPAL<sup>S</sup>MLQKAMEIIQQA  
FIN<sup>V</sup>AKKH<sup>F</sup>G<sup>E</sup>FFNLNQT<sup>V</sup>OSTIEDIKVKHTAKAENMIQLQFRMEQ<sup>M</sup>VF<sup>C</sup>QDQIYSV<sup>V</sup>LK<sup>K</sup>VREEIFNP  
LGT<sup>P</sup>SQNMKLN<sup>S</sup>H<sup>F</sup>PSNESSVSS<sup>F</sup>TEIGIHLNAYFLET<sup>S</sup>KRLANQIPFIQYFMLRENGDSLQKAMMQI  
LQEK<sup>N</sup>RYSWLLQ<sup>R</sup>SD<sup>T</sup>SD<sup>K</sup>RK<sup>F</sup>LKERL<sup>A</sup>RLTQARRRLAQ<sup>F</sup>PGdykddd<sup>k</sup>\*

**MX2(Stalk<sub>MX1</sub>)-Flag**

MSKAHKPWPYRRRSQFSSRKYLKEMNSFQQQPPPF<sup>G</sup>TVPPQMMFPPNWQGAEKDAAFLAKDFNFLTIN  
NQPPPGNRSQPRAMGPENNLYSQYEQKVRPCIDLIDSLRALGVEQDLALPAIAVIGDQSSGKSSVLEAL  
SGVALPRGSGIVTRCPLVLKLLKQPC<sup>E</sup>AWAGRISYRNTELELQDPGQVEKEIHK<sup>A</sup>QNV<sup>M</sup>MAGN<sup>G</sup>RGISHE  
LISLEITSPEVPDLTIIDLPGITRVAVDN<sup>Q</sup>PRDIGLQIKALIKKYIQRQQTINLVVPCNVDIATTEAL  
SMAHEVDPEGDRITIGILTKPDLMDRGTEK<sup>S</sup>VMNVVRNLTYPLKKG<sup>Y</sup>MI<sup>V</sup>KCRGQ<sup>Q</sup>EITNRLSLAEATKK  
EITFFQTHPYFRVLL<sup>E</sup>EGSATVPRLAERLTTELIMHIQKSLP<sup>L</sup>LEGQIRE<sup>S</sup>HQKATEELRRCGADIP<sup>S</sup>D  
ENEKMFFLIDKINAFNQDITALMQG<sup>E</sup>ETVGEEDIRL<sup>F</sup>TRLRHE<sup>F</sup>HKWSTIIEN<sup>N</sup>FQEGHKILSRKI<sup>Q</sup>K<sup>F</sup>  
ENQYRGRELPGFVNYRTFETIVK<sup>Q</sup>QIKALEEPAVDMLHTV<sup>T</sup>DMVRLA<sup>F</sup>TDVSIKNFEEFFNLHRTAK<sup>S</sup>K  
IEDIRAEQEREGEKLI<sup>R</sup>LHFQMEQIVYCQDQVYRGALQKVREKELEEEK<sup>K</sup>KK<sup>S</sup>WDFGAFQSSSATD<sup>S</sup>SM  
E<sup>E</sup>IFQHLMAYHQEASKRIS<sup>S</sup>SHIP<sup>L</sup>IIQFFMLQTYGQQLQKAMLQ<sup>L</sup>LQDKD<sup>T</sup>YSWLLKEQ<sup>S</sup>ETATKRRIL  
KERIYRLTQARHALCQFSSEIHdykddd<sup>k</sup>\*

**MX1(G<sub>MX2</sub>)-Flag**

MVVSEVDIAKADPAAASHPLLLNGDATVAQKNPGSVAENNLCSQYEEKVRPCIDLIDSLRALGVEQDLA  
LP<sup>A</sup>IAVIGDQSSGKSSVLEALSGVALPRGSGIVTRCPLVLKLLKQPC<sup>E</sup>AWAGRISYRNTELELQDPGQV  
EKEIHK<sup>A</sup>QNV<sup>M</sup>MAGN<sup>G</sup>RGISHELISLEITSPEVPDLTIIDLPGITRVAVDN<sup>Q</sup>PRDIGLQIKALIKKYIQR  
QQTINLVVPCNVDIATTEALSMAHEVDPEGDRITIGILTKPDLMDRGTEK<sup>S</sup>VMNVVRNLTYPLKKG<sup>Y</sup>MI  
VKCRGQ<sup>Q</sup>EITNRLSLAEATKKEITFFQTHPYFRVLL<sup>E</sup>EGSATVPRLAERLTTELIMHIQKSLP<sup>L</sup>LENQI  
KETHQRITEELQKYGV<sup>D</sup>IPEDENEKMFFLIDKINAFNQDITALMQG<sup>E</sup>ETVGEEDIRL<sup>F</sup>TRLRHE<sup>F</sup>HKWS  
TIIEN<sup>N</sup>FQEGHKILSRKI<sup>Q</sup>K<sup>F</sup>ENQYRGRELPGFVNYRTFETIVK<sup>Q</sup>QIKALEEPAVDMLHTV<sup>T</sup>DMVRLA<sup>F</sup>  
TDVSIKNFEEFFNLHRTAKSKIEDIRAEQEREGEKLI<sup>R</sup>LHFQMEQIVYCQDQVYRGALQKVREKELEEE  
K<sup>K</sup>KK<sup>S</sup>WDFGAFQSSSATDSSMEEIFQHLMAYHQEASKRIS<sup>S</sup>SHIP<sup>L</sup>IIQFFMLQTYGQQLQKAMLQ<sup>L</sup>LQD  
K<sup>D</sup>TYSWLLKERSD<sup>T</sup>SD<sup>K</sup>RK<sup>F</sup>LKERL<sup>A</sup>RLTQARRRLAQ<sup>F</sup>PGdykddd<sup>k</sup>\*

**MX2(G<sub>MX1</sub>)-Flag**

MSKAHKPWPYRRRSQFSSRKYLKEMNSFQQQPPPF<sup>G</sup>TVPPQMMFPPNWQGAEKDAAFLAKDFNFLT<sup>N</sup>  
NQPPPGNRSQPRAMGPENNL<sup>S</sup>QYEQV<sup>R</sup>PCIDLIDSLRALGVEQDLALPAIAVIGDQSSGKSSVLEAL  
SGVALPRGSGIVTRCPLVLK<sup>L</sup>KLKLVNEDKWRGKVS<sup>Y</sup>QDY<sup>E</sup>EIEISDASEVEKEINKAQNAIAGEGMGISH  
ELITTLEISSRDV<sup>P</sup>DLT<sup>L</sup>IDLPGITR<sup>V</sup>AVGNQ<sup>P</sup>ADIGYKIK<sup>T</sup>LK<sup>K</sup>YIQ<sup>R</sup>Q<sup>E</sup>TISL<sup>V</sup>VV<sup>P</sup>SNVDIATTEA  
LSMAQ<sup>E</sup>VDPEGDRTIGILTKPDLVDKGTEDKVV<sup>D</sup>VVRN<sup>L</sup>VFHLKKG<sup>Y</sup>MI<sup>V</sup>KCRGQ<sup>Q</sup>EIQDQ<sup>L</sup>SLSEALQ  
REKIFFENHPYFRDLLEEGKATV<sup>P</sup>CLAEKLTSELITHICKSLP<sup>L</sup>LEGGQIRESHQKATEELRRCGADIPS  
Q<sup>E</sup>ADKMFFLIEKIKMF<sup>N</sup>QDIEK<sup>L</sup>VEGEEV<sup>V</sup>REN<sup>E</sup>TRLYNKI<sup>R</sup>EDFK<sup>N</sup>WVGILATNTQ<sup>K</sup>V<sup>K</sup>NI<sup>I</sup>HEEVEK  
YEKQYRGKELLGFV<sup>N</sup>YKTFE<sup>I</sup>IVH<sup>Q</sup>YIQ<sup>Q</sup>LVEPAL<sup>S</sup>MLQ<sup>K</sup>AMEIQ<sup>Q</sup>AFINVAKKH<sup>F</sup>GEFFNL<sup>N</sup>Q<sup>T</sup>V<sup>Q</sup>S  
TIEDIKV<sup>K</sup>H<sup>T</sup>A<sup>K</sup>ENMIQ<sup>L</sup>Q<sup>R</sup>MEQ<sup>M</sup>V<sup>F</sup>CQ<sup>D</sup>Q<sup>I</sup>YSV<sup>V</sup>LK<sup>K</sup>V<sup>R</sup>EEIFN<sup>P</sup>LG<sup>T</sup>PSQ<sup>N</sup>M<sup>K</sup>L<sup>N</sup>SH<sup>F</sup>PS<sup>N</sup>ESS<sup>V</sup>  
SS<sup>F</sup>TEIGIHLNAY<sup>F</sup>LETSKRLANQ<sup>I</sup>PFIIQ<sup>Y</sup>FMLRENGDSLQ<sup>K</sup>AMM<sup>Q</sup>ILQ<sup>E</sup>KNRY<sup>S</sup>WLLQ<sup>E</sup>Q<sup>S</sup>ETAT<sup>K</sup>R  
RILKERIYRLTQARHALCQFSSKEIHdykddd\*

**MX2(G<sub>MX1 T103A</sub>)-Flag**

MSKAHKPWPYRRRSQFSSRKYLKEMNSFQQQPPPF<sup>G</sup>TVPPQMMFPPNWQGAEKDAAFLAKDFNFLT<sup>N</sup>  
NQPPPGNRSQPRAMGPENNL<sup>S</sup>QYEQV<sup>R</sup>PCIDLIDSLRALGVEQDLALPAIAVIGDQSSGKSSVLEAL  
SGVALPRGSGIVAR<sup>C</sup>PLVLK<sup>L</sup>KLKLVNEDKWRGKVS<sup>Y</sup>QDY<sup>E</sup>EIEISDASEVEKEINKAQNAIAGEGMGISH  
ELITTLEISSRDV<sup>P</sup>DLT<sup>L</sup>IDLPGITR<sup>V</sup>AVGNQ<sup>P</sup>ADIGYKIK<sup>T</sup>LK<sup>K</sup>YIQ<sup>R</sup>Q<sup>E</sup>TISL<sup>V</sup>VV<sup>P</sup>SNVDIATTEA  
LSMAQ<sup>E</sup>VDPEGDRTIGILTKPDLVDKGTEDKVV<sup>D</sup>VVRN<sup>L</sup>VFHLKKG<sup>Y</sup>MI<sup>V</sup>KCRGQ<sup>Q</sup>EIQDQ<sup>L</sup>SLSEALQ  
REKIFFENHPYFRDLLEEGKATV<sup>P</sup>CLAEKLTSELITHICKSLP<sup>L</sup>LEGGQIRESHQKATEELRRCGADIPS  
Q<sup>E</sup>ADKMFFLIEKIKMF<sup>N</sup>QDIEK<sup>L</sup>VEGEEV<sup>V</sup>REN<sup>E</sup>TRLYNKI<sup>R</sup>EDFK<sup>N</sup>WVGILATNTQ<sup>K</sup>V<sup>K</sup>NI<sup>I</sup>HEEVEK  
YEKQYRGKELLGFV<sup>N</sup>YKTFE<sup>I</sup>IVH<sup>Q</sup>YIQ<sup>Q</sup>LVEPAL<sup>S</sup>MLQ<sup>K</sup>AMEIQ<sup>Q</sup>AFINVAKKH<sup>F</sup>GEFFNL<sup>N</sup>Q<sup>T</sup>V<sup>Q</sup>S  
TIEDIKV<sup>K</sup>H<sup>T</sup>A<sup>K</sup>ENMIQ<sup>L</sup>Q<sup>R</sup>MEQ<sup>M</sup>V<sup>F</sup>CQ<sup>D</sup>Q<sup>I</sup>YSV<sup>V</sup>LK<sup>K</sup>V<sup>R</sup>EEIFN<sup>P</sup>LG<sup>T</sup>PSQ<sup>N</sup>M<sup>K</sup>L<sup>N</sup>SH<sup>F</sup>PS<sup>N</sup>ESS<sup>V</sup>  
SS<sup>F</sup>TEIGIHLNAY<sup>F</sup>LETSKRLANQ<sup>I</sup>PFIIQ<sup>Y</sup>FMLRENGDSLQ<sup>K</sup>AMM<sup>Q</sup>ILQ<sup>E</sup>KNRY<sup>S</sup>WLLQ<sup>E</sup>Q<sup>S</sup>ETAT<sup>K</sup>R  
RILKERIYRLTQARHALCQFSSKEIHdykddd\*

**MX1(G Stalk<sub>MX2</sub>)-Flag**

MVVSEVDIAKADPAAASHPLLLNGDATVAQKNPGSVAENNLCSQYEEKV<sup>R</sup>PCIDLIDSLRALGVEQDLA  
LPAIAVIGDQSSGKSSVLEALSGVALPRGSGIVTRCPLVLK<sup>L</sup>KKQ<sup>P</sup>CEAWAGRI<sup>S</sup>YRNTELELQDPGQV  
EKEI<sup>H</sup>KAQ<sup>N</sup>VMAGN<sup>R</sup>GISHELISLEITSPEVPDLT<sup>I</sup>IDLPGITR<sup>V</sup>AVDNQ<sup>P</sup>RDIGLQ<sup>I</sup>KALIK<sup>K</sup>YIQ<sup>R</sup>  
QQTINLVVPC<sup>N</sup>VDIATTEALSMAHEVDPEGDRTIGILTKPDLMDRGTEK<sup>S</sup>VMNV<sup>V</sup>RN<sup>L</sup>TYPLK<sup>K</sup>GYMI  
VKCRGQ<sup>Q</sup>EITNRLSLAEATKKEITFFQ<sup>T</sup>HPYFRV<sup>L</sup>LEEGSATV<sup>P</sup>RLAERLTTELIMHI<sup>Q</sup>KSLP<sup>L</sup>LENQ<sup>I</sup>  
KETHQ<sup>R</sup>ITEELQ<sup>K</sup>YGV<sup>D</sup>IP<sup>E</sup>Q<sup>E</sup>ADKMFFLIEKIKMF<sup>N</sup>QDIEK<sup>L</sup>VEGEEV<sup>V</sup>REN<sup>E</sup>TRLYNKI<sup>R</sup>EDFK<sup>N</sup>WV  
GILATNTQ<sup>K</sup>V<sup>K</sup>NI<sup>I</sup>HEEVEKYEKQYRGKELLGFV<sup>N</sup>YKTFE<sup>I</sup>IVH<sup>Q</sup>YIQ<sup>Q</sup>LVEPAL<sup>S</sup>MLQ<sup>K</sup>AMEIQ<sup>Q</sup>AF  
INVAKKH<sup>F</sup>GEFFNL<sup>N</sup>Q<sup>T</sup>V<sup>Q</sup>STIEDIKV<sup>K</sup>H<sup>T</sup>A<sup>K</sup>ENMIQ<sup>L</sup>Q<sup>R</sup>MEQ<sup>M</sup>V<sup>F</sup>CQ<sup>D</sup>Q<sup>I</sup>YSV<sup>V</sup>LK<sup>K</sup>V<sup>R</sup>EEIFN<sup>P</sup>L  
G<sup>T</sup>PSQ<sup>N</sup>M<sup>K</sup>L<sup>N</sup>SH<sup>F</sup>PS<sup>N</sup>ESS<sup>V</sup>SS<sup>F</sup>TEIGIHLNAY<sup>F</sup>LETSKRLANQ<sup>I</sup>PFIIQ<sup>Y</sup>FMLRENGDSLQ<sup>K</sup>AMM<sup>Q</sup>IL  
Q<sup>E</sup>KNRY<sup>S</sup>WLLQ<sup>E</sup>RS<sup>D</sup>TSD<sup>K</sup>RK<sup>F</sup>LKERL<sup>A</sup>RLTQARRRLA<sup>Q</sup>FP<sup>G</sup>dykddd\*

**MX2(G Stalk<sub>MX1</sub>)-Flag**

MSKAHKPWPYRRRSQFSSRKYLKEMNSFQQQPPPF<sup>G</sup>TVPPQMMFPPNWQGAEKDAAFLAKDFNFLT<sup>N</sup>  
NQPPPGNRSQPRAMGPENNL<sup>S</sup>QYEQV<sup>R</sup>PCIDLIDSLRALGVEQDLALPAIAVIGDQSSGKSSVLEAL  
SGVALPRGSGIVTRCPLVLK<sup>L</sup>KLKLVNEDKWRGKVS<sup>Y</sup>QDY<sup>E</sup>EIEISDASEVEKEINKAQNAIAGEGMGISH  
ELITTLEISSRDV<sup>P</sup>DLT<sup>L</sup>IDLPGITR<sup>V</sup>AVGNQ<sup>P</sup>ADIGYKIK<sup>T</sup>LK<sup>K</sup>YIQ<sup>R</sup>Q<sup>E</sup>TISL<sup>V</sup>VV<sup>P</sup>SNVDIATTEA  
LSMAQ<sup>E</sup>VDPEGDRTIGILTKPDLVDKGTEDKVV<sup>D</sup>VVRN<sup>L</sup>VFHLKKG<sup>Y</sup>MI<sup>V</sup>KCRGQ<sup>Q</sup>EIQDQ<sup>L</sup>SLSEALQ  
REKIFFENHPYFRDLLEEGKATV<sup>P</sup>CLAEKLTSELITHICKSLP<sup>L</sup>LEGGQIRESHQKATEELRRCGADIPS  
DENEKMF<sup>L</sup>IDKINAF<sup>N</sup>QDIT<sup>A</sup>LMQ<sup>G</sup>EETV<sup>G</sup>EEDIRL<sup>F</sup>TRLRHE<sup>F</sup>HK<sup>W</sup>STI<sup>I</sup>ENNF<sup>Q</sup>EGH<sup>K</sup>ILSR<sup>K</sup>IQ<sup>K</sup>  
FENQYRGRELPGFV<sup>N</sup>YRTFETIV<sup>K</sup>Q<sup>Q</sup>IKALEEP<sup>A</sup>VDMLHTV<sup>T</sup>DMV<sup>R</sup>LAFT<sup>D</sup>V<sup>S</sup>IKNFEE<sup>F</sup>FN<sup>L</sup>HRT<sup>A</sup>K<sup>S</sup>  
KIEDIRAEQERE<sup>G</sup>EKLIRLHFQ<sup>M</sup>EIQ<sup>V</sup>YCDQ<sup>V</sup>YRGALQ<sup>K</sup>VREKELEEEK<sup>K</sup>KS<sup>W</sup>DFGAFQ<sup>S</sup>SSAT<sup>D</sup>SS  
MEEIFQ<sup>H</sup>LMA<sup>Y</sup>HQ<sup>E</sup>ASKRIS<sup>S</sup>HIPLIIQ<sup>F</sup>FMLQ<sup>T</sup>Y<sup>G</sup>Q<sup>Q</sup>LQ<sup>K</sup>AMLQ<sup>L</sup>LQ<sup>D</sup>KD<sup>T</sup>YSWLL<sup>L</sup>KEQ<sup>S</sup>ETAT<sup>K</sup>RRI  
LKERIYRLTQARHALCQFSSKEIHdykddd\*

**MX1(N<sub>MX2</sub>)-Flag**

MSKAHKPWPYRRRSQFSSRKYLKEMNSFQQQPPPF<sup>G</sup>TVPPQMMFPPNWQGAEKDAAFLAKDFNFLT<sup>N</sup>  
NQPPPGNRSQPRAMGPEN<sup>N</sup>LYSQYEEKVRPCIDLIDSLRALGVEQDLALPAIAVIGDQSSGKSSVLEAL  
SGVALPRGSGIVTRCPLVLK<sup>K</sup>LVNEDKWRGKVSQDYEIEISDASEVEKEINKAQNAIAGEGMGISH  
ELITTLEISSRDV<sup>P</sup>DLT<sup>L</sup>IDLPGITRVA<sup>V</sup>GNQPADIGYKIK<sup>T</sup>LK<sup>K</sup>YIQRQETISL<sup>V</sup>VVPSNVDIATEAL  
SMAQEVDPEDRTIGILTKPDLVDKGTEDKVV<sup>D</sup>VVRNLV<sup>F</sup>H<sup>L</sup>KKGYMIVKCRGQ<sup>Q</sup>EIQDQ<sup>L</sup>SLSEALQ<sup>R</sup>  
EKIFFENHPYFRDLLEEGKATVPC<sup>L</sup>AEKLTSELITHICKSLP<sup>L</sup>LENQIKETHQRITEELQKYGV<sup>D</sup>IPED  
ENEKMF<sup>F</sup>LIDKINAF<sup>N</sup>QDIT<sup>A</sup>LMQGEETVGEEDIRL<sup>F</sup>TRLRHEFH<sup>K</sup>WSTI<sup>I</sup>ENNFQEGHKILSRKI<sup>Q</sup>K<sup>F</sup>  
ENQYRGRELPGFVNYRTFETIVK<sup>Q</sup>QIKALEEPAVDMLHTV<sup>T</sup>DMVRLA<sup>F</sup>TDVSIKNFEEFFNLHRTAK<sup>S</sup>  
IEDIRAEQEREGEK<sup>L</sup>IRLHFQMEQIVYCQDQVYRGALQKVREKELEEEK<sup>K</sup>KK<sup>K</sup>SWDFGAFQSSSATD<sup>S</sup>SM  
EEIFQHLMAYHQEASKRIS<sup>S</sup>HIPLIIQFFMLQTYGQQLQKAMLQ<sup>L</sup>LQDKDTYSWLLKERSDTSD<sup>K</sup>RRK<sup>F</sup>  
KERLARLTQARRRLAQFPGdykddd<sup>k</sup>\*

**MX1<sub>K83A</sub>(N<sub>MX2</sub>)-Flag**

MSKAHKPWPYRRRSQFSSRKYLKEMNSFQQQPPPF<sup>G</sup>TVPPQMMFPPNWQGAEKDAAFLAKDFNFLT<sup>N</sup>  
NQPPPGNRSQPRAMGPEN<sup>N</sup>LYSQYEEKVRPCIDLIDSLRALGVEQDLALPAIAVIGDQSSG<sup>A</sup>SSVLEAL  
SGVALPRGSGIVTRCPLVLK<sup>K</sup>LVNEDKWRGKVSQDYEIEISDASEVEKEINKAQNAIAGEGMGISH  
ELITTLEISSRDV<sup>P</sup>DLT<sup>L</sup>IDLPGITRVA<sup>V</sup>GNQPADIGYKIK<sup>T</sup>LK<sup>K</sup>YIQRQETISL<sup>V</sup>VVPSNVDIATEAL  
SMAQEVDPEDRTIGILTKPDLVDKGTEDKVV<sup>D</sup>VVRNLV<sup>F</sup>H<sup>L</sup>KKGYMIVKCRGQ<sup>Q</sup>EIQDQ<sup>L</sup>SLSEALQ<sup>R</sup>  
EKIFFENHPYFRDLLEEGKATVPC<sup>L</sup>AEKLTSELITHICKSLP<sup>L</sup>LENQIKETHQRITEELQKYGV<sup>D</sup>IPED  
ENEKMF<sup>F</sup>LIDKINAF<sup>N</sup>QDIT<sup>A</sup>LMQGEETVGEEDIRL<sup>F</sup>TRLRHEFH<sup>K</sup>WSTI<sup>I</sup>ENNFQEGHKILSRKI<sup>Q</sup>K<sup>F</sup>  
ENQYRGRELPGFVNYRTFETIVK<sup>Q</sup>QIKALEEPAVDMLHTV<sup>T</sup>DMVRLA<sup>F</sup>TDVSIKNFEEFFNLHRTAK<sup>S</sup>  
IEDIRAEQEREGEK<sup>L</sup>IRLHFQMEQIVYCQDQVYRGALQKVREKELEEEK<sup>K</sup>KK<sup>K</sup>SWDFGAFQSSSATD<sup>S</sup>SM  
EEIFQHLMAYHQEASKRIS<sup>S</sup>HIPLIIQFFMLQTYGQQLQKAMLQ<sup>L</sup>LQDKDTYSWLLKERSDTSD<sup>K</sup>RRK<sup>F</sup>  
KERLARLTQARRRLAQFPGdykddd<sup>k</sup>\*

**MX1<sub>T103A</sub>(N<sub>MX2</sub>)-Flag**

MSKAHKPWPYRRRSQFSSRKYLKEMNSFQQQPPPF<sup>G</sup>TVPPQMMFPPNWQGAEKDAAFLAKDFNFLT<sup>N</sup>  
NQPPPGNRSQPRAMGPEN<sup>N</sup>LYSQYEEKVRPCIDLIDSLRALGVEQDLALPAIAVIGDQSSGKSSVLEAL  
SGVALPRGSGIV<sup>A</sup>RCPLVLK<sup>K</sup>LVNEDKWRGKVSQDYEIEISDASEVEKEINKAQNAIAGEGMGISH  
ELITTLEISSRDV<sup>P</sup>DLT<sup>L</sup>IDLPGITRVA<sup>V</sup>GNQPADIGYKIK<sup>T</sup>LK<sup>K</sup>YIQRQETISL<sup>V</sup>VVPSNVDIATEAL  
SMAQEVDPEDRTIGILTKPDLVDKGTEDKVV<sup>D</sup>VVRNLV<sup>F</sup>H<sup>L</sup>KKGYMIVKCRGQ<sup>Q</sup>EIQDQ<sup>L</sup>SLSEALQ<sup>R</sup>  
EKIFFENHPYFRDLLEEGKATVPC<sup>L</sup>AEKLTSELITHICKSLP<sup>L</sup>LENQIKETHQRITEELQKYGV<sup>D</sup>IPED  
ENEKMF<sup>F</sup>LIDKINAF<sup>N</sup>QDIT<sup>A</sup>LMQGEETVGEEDIRL<sup>F</sup>TRLRHEFH<sup>K</sup>WSTI<sup>I</sup>ENNFQEGHKILSRKI<sup>Q</sup>K<sup>F</sup>  
ENQYRGRELPGFVNYRTFETIVK<sup>Q</sup>QIKALEEPAVDMLHTV<sup>T</sup>DMVRLA<sup>F</sup>TDVSIKNFEEFFNLHRTAK<sup>S</sup>  
IEDIRAEQEREGEK<sup>L</sup>IRLHFQMEQIVYCQDQVYRGALQKVREKELEEEK<sup>K</sup>KK<sup>K</sup>SWDFGAFQSSSATD<sup>S</sup>SM  
EEIFQHLMAYHQEASKRIS<sup>S</sup>HIPLIIQFFMLQTYGQQLQKAMLQ<sup>L</sup>LQDKDTYSWLLKERSDTSD<sup>K</sup>RRK<sup>F</sup>  
KERLARLTQARRRLAQFPGdykddd<sup>k</sup>\*

**MX2(N<sub>MX1</sub>)-Flag**

MVVSEVDIAKADPAAASHPLLLNGDATVAQKNPGSVAENNLCSQYEQKVRPCIDLIDSLRALGVEQDLA  
LPAAVIGDQSSGKSSVLEALSGVALPRGSGIVTRCPLVLK<sup>K</sup>QPC<sup>E</sup>AWAGRI<sup>S</sup>YRNTELELQDPGQ<sup>V</sup>  
EKEI<sup>H</sup>KAQNV<sup>M</sup>MAGN<sup>R</sup>GISHELISLEITSPEV<sup>P</sup>DLT<sup>I</sup>IDLPGITRVA<sup>V</sup>DNQPRD<sup>I</sup>GLQIKALIK<sup>K</sup>YIQ<sup>R</sup>  
QQTINLVVPCNVDIATTEAL<sup>S</sup>MAHEVDPEGDRTIGILTKPDLMDRGTEK<sup>S</sup>VMNVVRNLTYPLK<sup>K</sup>GYM<sup>I</sup>  
VKCRGQ<sup>Q</sup>EITNRLSLAEATKKEITFFQTHPYFRV<sup>L</sup>LEEGSATVPRLAERLTTELIMHIQKSLP<sup>L</sup>LEGQ<sup>I</sup>  
RESHQKATEELRRCGADIPSQ<sup>E</sup>EADKMFFLIEKIKMF<sup>N</sup>QDIEKLV<sup>E</sup>GE<sup>E</sup>VVREN<sup>E</sup>TRLYNKIRED<sup>F</sup>KNW<sup>V</sup>  
GILATNTQ<sup>K</sup>VKNI<sup>I</sup>HEEVEKYE<sup>K</sup>QYRGKELLGFVNYKTFEIVH<sup>Q</sup>YIQQLVEPALSM<sup>L</sup>QKAMEIIQQA<sup>F</sup>  
INVAKKHGFEFFNLNQT<sup>V</sup>QSTIEDIKVKHTAKAENMIQLQ<sup>F</sup>RMEQMVFCDQ<sup>I</sup>YSVVLK<sup>K</sup>VREEIFN<sup>P</sup>L  
GTPSQNMKLN<sup>S</sup>HP<sup>S</sup>NESSVSS<sup>F</sup>TEIGIHLNAYFLET<sup>S</sup>KRLANQIPFI<sup>I</sup>QYFMLRENGDSLQKAMM<sup>Q</sup>IL  
QEK<sup>N</sup>RYSWLLQEQSETATKRRILKERIYRLTQARHALCQFSSKEIHdykddd<sup>k</sup>\*

### mmMx1-Flag

MDSVNNLCRHYEEKVRPCIDLIDTLRALGVEQDLALPAIAVIGDQSSGKSSVLEALSGVALPRGSGIVTRCPLVLKLRKLKEGEEWRGKVSYDDIEVELSDPSEVEEAINKGQNF IAGVGLGISDKLISLDVSSPNV PDLTLIDLPGITRVAVGNQPADIGRQIKRLIKTYIQKQETINLVVPSNVDIATTEALSMAQEVDPEDR TIGVLT KPDLDVRGAEGKVLDMRNLVYPLKKGYMIVKCRGQDIOEQLSLTEAFQKEQVFFKDHYSFS ILLEDGKATVPCLAERLTEELTSHICKSLP LLEDQINSSHQSASEELQKYGADIPEDDRTRMSFLVNKI SAFNRNIMNLIQAQETVSEGD SRLFTKLRNEFLAWDDHIEEYFKKDSPEVQSKMKEFENQYRGRELPGF VDYKAFESI IKKRVKALEESAVNMLRRVTM VQTAFVKILSNDFGDFLNLCC TAKSKIKEIRLNQEKEA ENLIRLHFQMEQIVYCDQVYKETLKTIREKEAEKEKTKALINPATFQNN SQFPQGLTTTTEMTQHLK AYYQECRRNIGRQIPLIQYFILKTFGEEIEKMLQLLQDTSKCSWFLEEQSDTREKKKFLKRRLRLDE ARQKLAKFSDDykdddk\*

### mmMx1(N<sub>Mx2</sub>)-Flag

MSKAHKPWPYRRRSQFSSRKYLKKE MN SFQQQPPPGTVPQMMFPPNWQGAEKDAAFLAKDFNFLT LN NQPPPGNRSQPRAMGPENNLYSQYEEKVRPCIDLIDTLRALGVEQDLALPAIAVIGDQSSGKSSVLEAL SGVALPRGSGIVTRCPLVLKLRKLKEGEEWRGKVSYDDIEVELSDPSEVEEAINKGQNF IAGVGLGISD KLISLDVSSPNV PDLTLIDLPGITRVAVGNQPADIGRQIKRLIKTYIQKQETINLVVPSNVDIATTEA LSMAQEVDPEDRTIGVLT KPDLDVRGAEGKVLDMRNLVYPLKKGYMIVKCRGQDIOEQLSLTEAFQ KEQVFFKDHYSFS ILLEDGKATVPCLAERLTEELTSHICKSLP LLEDQINSSHQSASEELQKYGADIPE DDRTRMSFLVNKISAFNRNIMNLIQAQETVSEGD SRLFTKLRNEFLAWDDHIEEYFKKDSPEVQSKMKE FENQYRGRELPGFVDYKAFESI IKKRVKALEESAVNMLRRVTM VQTAFVKILSNDFGDFLNLCC TAKS KIKEIRLNQEKEAENLIRLHFQMEQIVYCDQVYKETLKTIREKEAEKEKTKALINPATFQNN SQFPQ GLTTTTEMTQHLKAYYQECRRNIGRQIPLIQYFILKTFGEEIEKMLQLLQDTSKCSWFLEEQSDTREK KFLKRRLRLDEARQKLAKFSDDykdddk\*

### mmMx2-Flag

MVLSTEENTGVDSVNLP SGETGLGEKDQESVNNLCSQYEEKVRPCIDLIDSLRALGVEQDLALPAIAVI GDQSSGKSSVLEALSGVALPRGSGIVTRCPLVLKLRKLNEGEEWRGKVSYDDIEVELSDPSEVEEAINK GQNF IAGVGLGISDKLISLDVSSPNV PDLTLIDLPGITRVAVGNQPADIGRQIKRLIKTYIQKQETINL VVPSNVDIATTEALSMAQEVDPEDRTIGILT KPDLDVRGTEDKVVDVVRNLVYHLKKGYMIVKCRGQ QDIOEQLSLTEALQNEQIFFKEHPHFRV LLEDGKATVPCLAERLTAE LISHICKSLP LLENQIKESHQS ASEELQKYGMDIPEDDSEKTFFLIEKINAFNQDIT ALVQGEENVAEGECRLFTRLRKEFLSWSKEIEKN FEKGYAVLYNEVWAF EKQYRGRELPGFVNYKTFENI IRRQIKTLEEPAIEMLHTVTEIVRAAFTSVSEK NFESEFYNLHRTTKSKLEDIRLEQEKEAEMSIRLHFKMEQI IYCDQIYRGALQKVREEEAEKKTHTGT SSSSQSDLOTSSMAEIFQH LNAYRQEAHNRIS SHVPLIQYFILKMF AERLQKGMQLLQDKDSCSWL LKEQSDTSEKRKFLKERLARLAQARRRLAKFPGDYKDDDKdykdddk\*

### mmMx2(N<sub>Mx2</sub>)-Flag

MSKAHKPWPYRRRSQFSSRKYLKKE MN SFQQQPPPGTVPQMMFPPNWQGAEKDAFLAKDFNFLT LN QPPPGNRSQPRAMGPENNLYSQYEEKVRPCIDLIDSLRALGVEQDLALPAIAVIGDQSSGKSSVLEALS GVALPRGSGIVTRCPLVLKLRKLNEGEEWRGKVSYDDIEVELSDPSEVEEAINKGQNF IAGVGLGISD K LISLDVSSPNV PDLTLIDLPGITRVAVGNQPADIGRQIKRLIKTYIQKQETINLVVPSNVDIATTEAL SMAQEVDPEDRTIGILT KPDLDVRGEDKVVDVVRNLVYHLKKGYMIVKCRGQDIOEQLSLTEALQNE QIFFKEHPHFRV LLEDGKATVPCLAERLTAE LISHICKSLP LLENQIKESHQSASEELQKYGMDIPEDD SEKTFFLIEKINAFNQDIT ALVQGEENVAEGECRLFTRLRKEFLSWSKEIEKNFEKGYAVLYNEVWAFE KQYRGRELPGFVNYKTFENI IRRQIKTLEEPAIEMLHTVTEIVRAAFTSVSEKNFESEFYNLHRTTKSKL EDIRLEQEKEAEMSIRLHFKMEQI IYCDQIYRGALQKVREEEAEKKTHTGTSSSSQSDLOTSSMA EIFQH LNAYRQEAHNRIS SHVPLIQYFILKMF AERLQKGMQLLQDKDSCSWLLKEQSDTSEKRKFLK ERLARLAQARRRLAKFPGDYKDDDKdykdddk\*

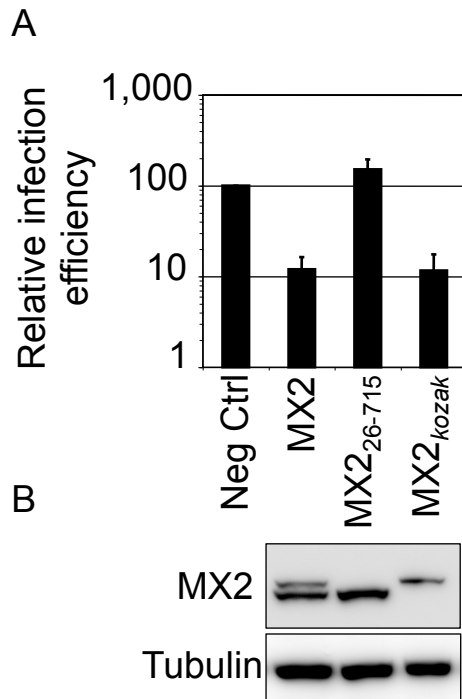

**Supplementary Figure 2. The full-length isoform of MX2 is uniquely responsible for the anti-HIV-1 activity.**

A. U87-MG/CD4/CXCR4 cells were transduced with EasiLV expressing CD8 (Neg Ctrl), MX2 wild type, MX2 short isoform (MX2<sub>26-715</sub>) and MX2 long isoform (MX2<sub>kozak</sub>) cDNAs and treated with doxycycline for 48 h prior to HIV-1 infection. The cells were infected with 25 ng p24<sup>Gag</sup> of NL4-3/Nef-IRES-Renilla and infection efficiency was monitored at 48 h by measuring Renilla activity. Mean relative infection efficiencies with standard deviations from three independent experiments are shown.

B. Immunoblot analysis of parallel samples. Protein levels of MX2 wild type, MX2 short isoform (MX2<sub>26-715</sub>) and MX2 long isoform (MX2<sub>kozak</sub>) were determined using a Flag-specific antibody and tubulin served as a loading control.

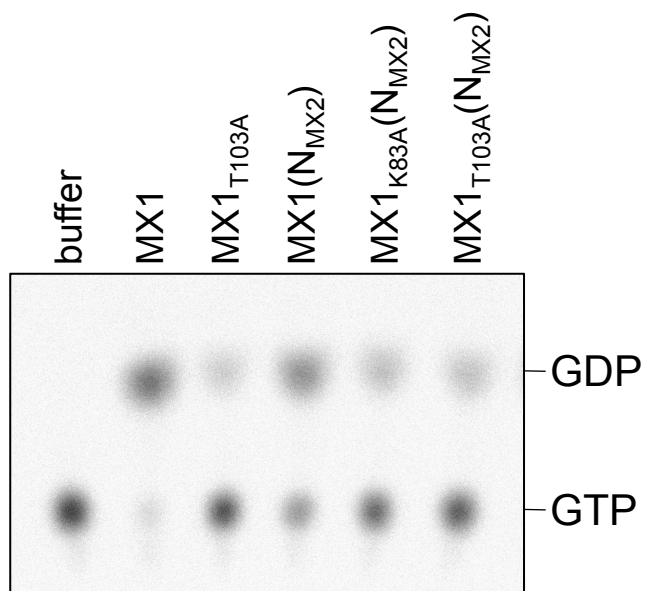

**Supplementary Figure 3. The MX1<sub>K83A</sub>(N<sub>MX2</sub>) and MX1<sub>T103A</sub>(N<sub>MX2</sub>) chimerae lack GTPase activity.**

MX proteins were immunoprecipitated from transfected 293T cell lysates and incubated with [ $\alpha$ -<sup>32</sup>P] GTP using a standard GTPase assay. GDP and GTP were resolved using thin-layer chromatography and visualized by autoradiography.

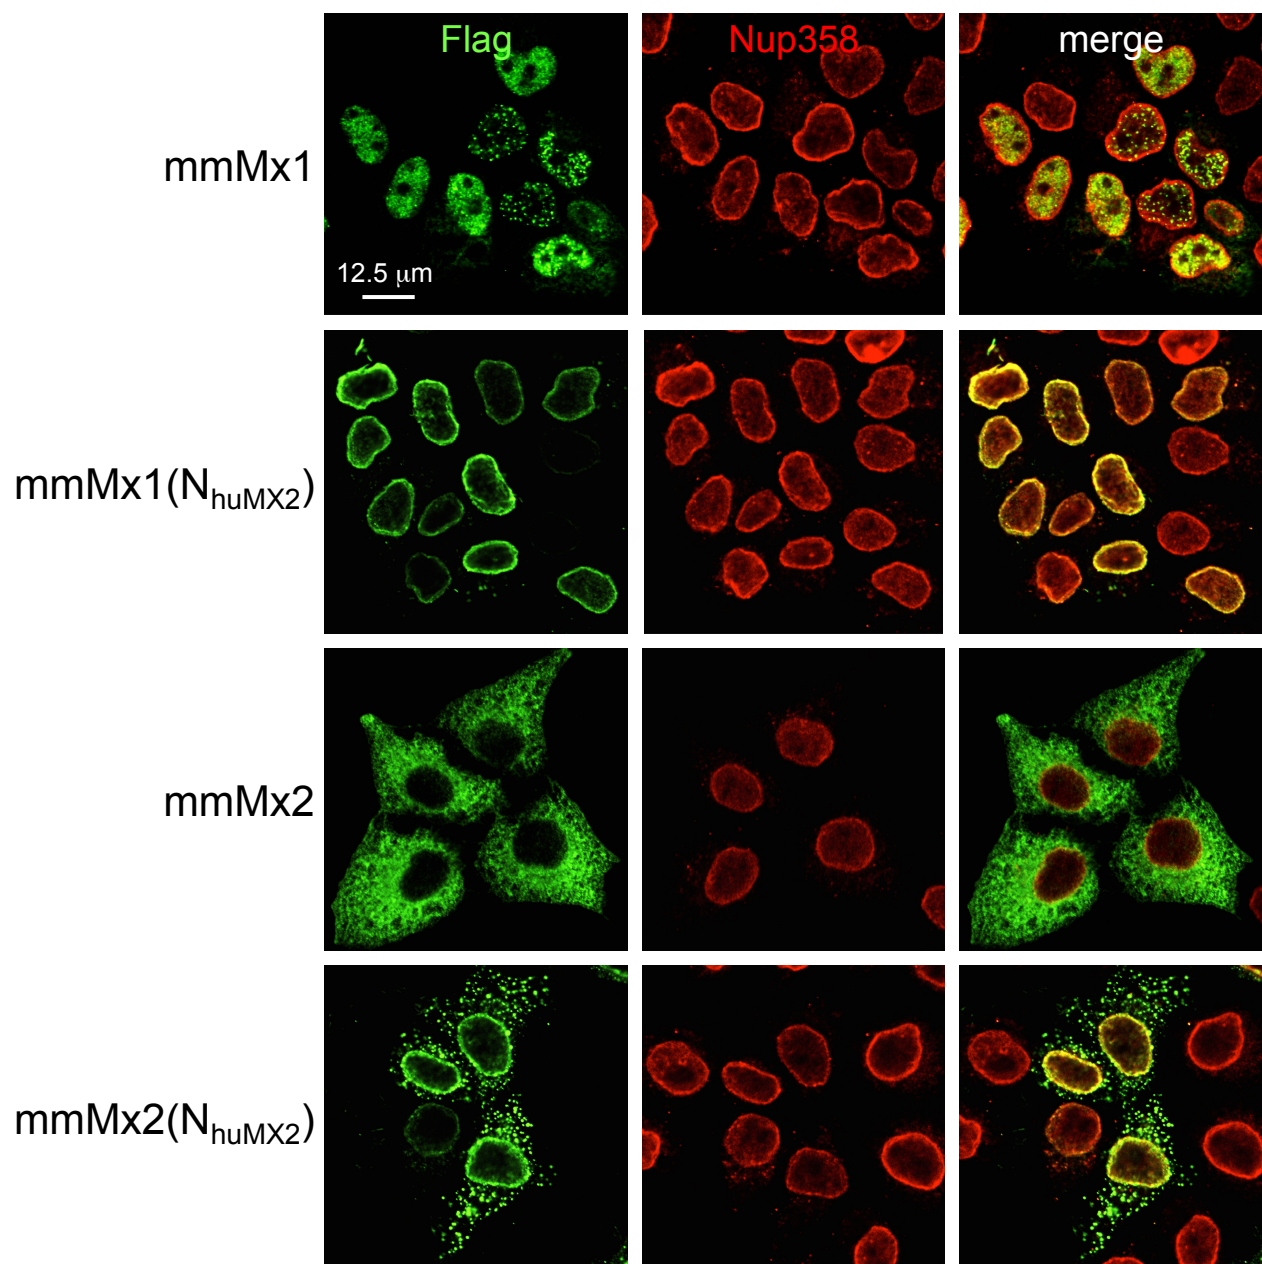

**Supplementary Figure 4. Mouse Mx1 and Mx2 are re-localised to the nuclear envelope when bearing the N-terminal domain of human MX2.**

HeLa cells were seeded on glass coverslips, transfected with vectors expressing Flag-tagged mmMx1, mmMx1(N<sub>huMX2</sub>), mmMx2 or mmMx2(N<sub>huMX2</sub>) and fixed 16 h post-transfection. MX proteins and the NE were visualized by indirect immunofluorescence using Flag- or NUP358-specific antibodies, respectively, and confocal microscopy. Scale bar, 12.5  $\mu\text{m}$ .
